# Supplementary material
Source: publisher site journal article supplement (https://www.degruyterbrill.com/publication/journal_key/MATH/downloadAsset/MATH_CFP_Nonlinear%20Differential%20Equations.pdf)
Supplement: Supplementary file 1 [file MATH_CFP_Nonlinear%20Differential%20Equations.pdf]

# Nonlinear Differential Equations: New Perspectives and Techniques

## GUEST EDITORS

---

**Umberto Guarnotta**, Università degli Studi di Catania, Italy; e-mail: [umberto.guarnotta@unict.it](mailto:umberto.guarnotta@unict.it)

**Laura Baldelli**, Karlsruher Institut für Technologie, Germany; e-mail: [laura.baldelli@kit.edu](mailto:laura.baldelli@kit.edu)

**Simone Ciani**, Università degli Studi di Bologna, Italy; e-mail: [simone.ciani3@unibo.it](mailto:simone.ciani3@unibo.it)

## DESCRIPTION

---

Describing, forecasting, and controlling the evolution of a wide variety of real-world phenomena (such as those in physics, chemistry, finance, biology, ecology, medicine, sociology, and industrial processes) necessitate the consideration of nonlinear differential equations. Indeed, families of ordinary and partial differential equations encompass a vast range of phenomena, and their comprehensive understanding requires the cooperation of various branches of analysis.

This Special Issue in *Open Mathematics* aims to present recent trends and advances in nonlinear analysis devoted to differential equations, including existence and nonexistence results, as well as qualitative properties of the solutions, such as symmetry and regularity. Both variational and non-variational methods of nonlinear analysis will be explored to highlight different approaches and techniques contributing to the field.

**Topics of interest:** existence, multiplicity, regularity, and qualitative properties of solutions to ordinary or partial differential equations; variational or topological methods in nonlinear analysis

**Keywords:** ODEs, PDEs, nonlinear analysis, variational methods, topological methods

## HOW TO SUBMIT

---

Before submission authors should carefully read the **[Instruction for Authors](#)**.

Manuscripts have to be written in LATEX, AMS-TEX, AMS-LATEX. We do not accept papers in Plain TEX format. **For an initial submission, the authors are strongly advised to upload their entire manuscript, including tables and figures, as a single PDF file.**

All submissions to the Special Issue must be made electronically via online submission system **Editorial Manager**: [www.editorialmanager.com/openmath](http://www.editorialmanager.com/openmath)

All manuscripts will undergo the standard peer-review process (single blind, at least two independent reviewers). When entering the submission via online submission system authors should **choose the category "Special Issue on Nonlinear Differential Equations: New Perspectives and Techniques."**

Submission of a manuscript implies that the work described has not been published before and it is not under consideration for publication anywhere else.

**The deadline for submissions is October 31, 2026**, but individual papers will be reviewed and published online on an ongoing basis.

Contributors to the Special Issue will benefit from:

- Editorial Manager: a convenient and well-known online manuscript submission and tracking system
- Access to a technologically advanced publishing platform
- **Fair and constructive peer review**
- Adherence to the highest editorial standards and practices
- Promotion of published papers to readers and citers
- Distribution to **open access** directories (such as DOAJ) and thousands of libraries worldwide
- Inclusion in prestigious international indexing services
- **Liberal policies on copyrights** (authors retain copyright) and on self-archiving (no embargo periods)
  - **License to Publish (CC-BY).**
- Secure archiving by De Gruyter and the independent archiving service Portico

We are looking forward to your submission!

In case of any questions please contact Editorial Office, [openmathematics@degruyterbrill.com](mailto:openmathematics@degruyterbrill.com).
